# Supplementary material for: Synthesis of mesoporous carbon nanoparticles with large and tunable pore sizes
Source: Royal Society of Chemistry journal article supplement (doi:10.1039/c5nr02389k), 2015-01-01
Supplement: c5nr02389k1.pdf [file c5nr02389k1.pdf]

## Electronic Supplementary Information

### **Synthesis of mesoporous carbon nanoparticles with large and tunable pore sizes**

Chao Liu, Meihua Yu, Yang Li, Jiansheng Li\*, Jing Wang, Chengzhong Yu\*, Lianjun Wang\*

[\*] C. Liu, Y. Li, Prof. J.S. Li, J. Wang, Prof. L.J. Wang

Jiangsu Key Laboratory of Chemical Pollution Control and Resources Reuse

School of Environmental and Biological Engineering

Nanjing University of Science and Technology

Nanjing 210094, P.R. China

E-mail: lijsh@mail.njust.edu.cn; wanglj@mail.njust.edu.cn

Dr. M.H. Yu, Prof. C.Z. Yu

Australian Institute for Bioengineering and Nanotechnology, The University of Queensland

Brisbane, QLD 4072, Australia

E-mail: c.yu@uq.edu.au

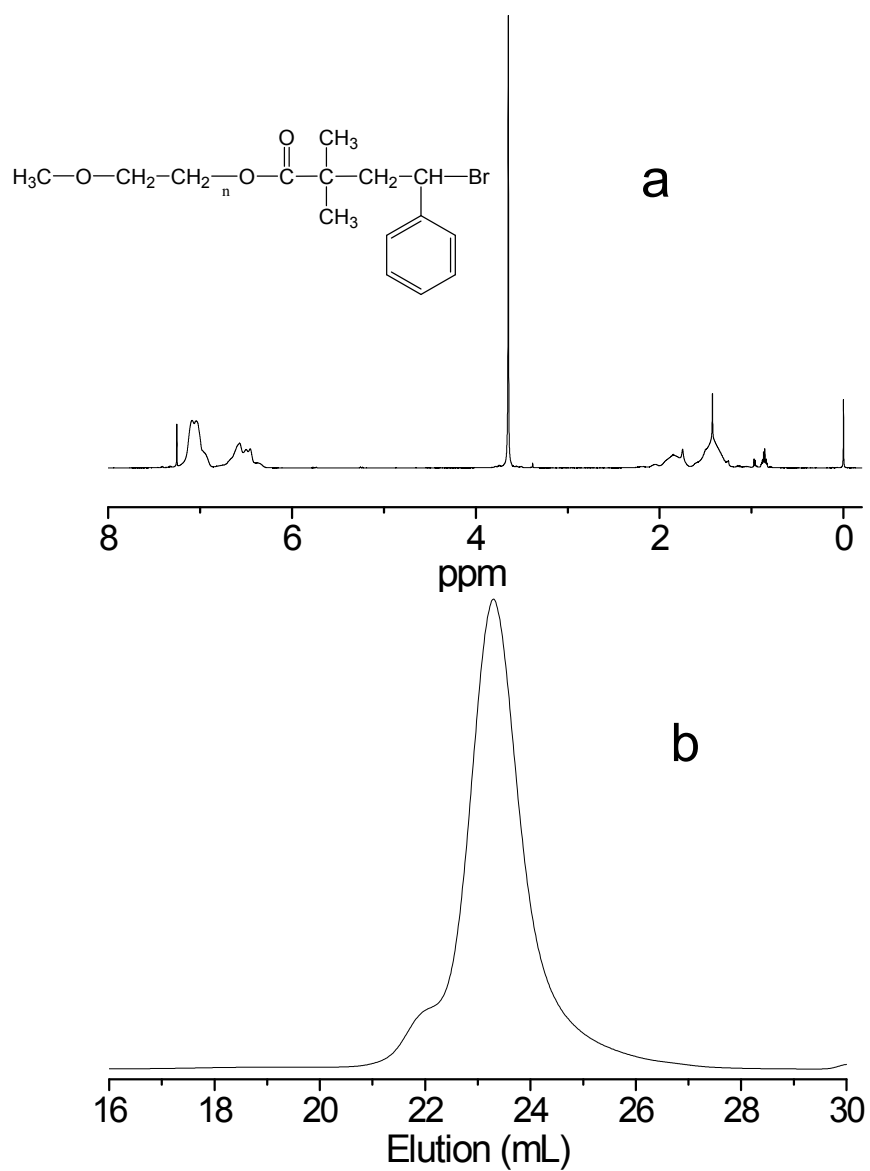

**Figure S1.** (a)  $^1\text{H}$  NMR spectra, (b) GPC traces of  $\text{PEO}_{125}\text{-}b\text{-PS}_{178}$ .

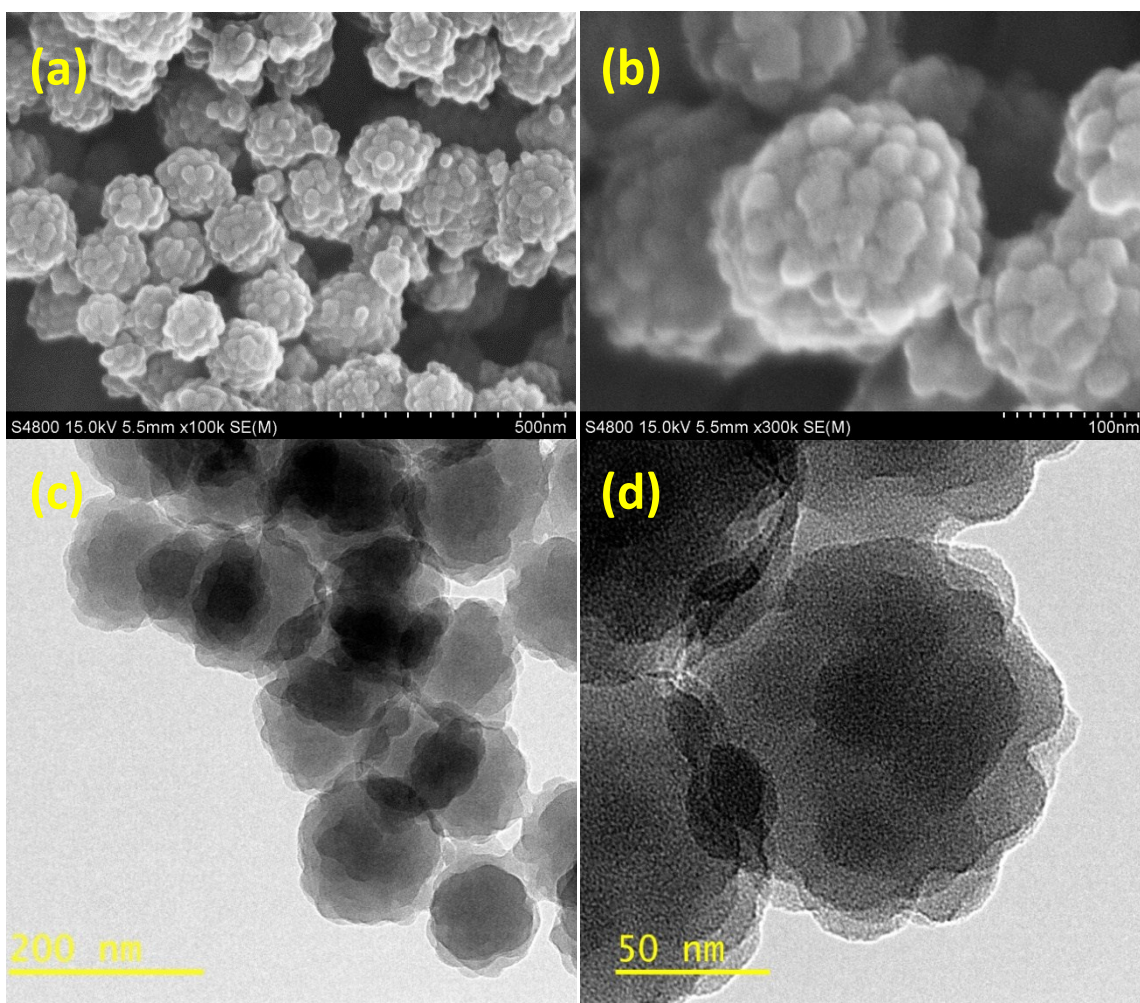

**Figure S2.** SEM images (a, b) and TEM images (c, d) of PR/PEO-*b*-PS composite nanoparticles.

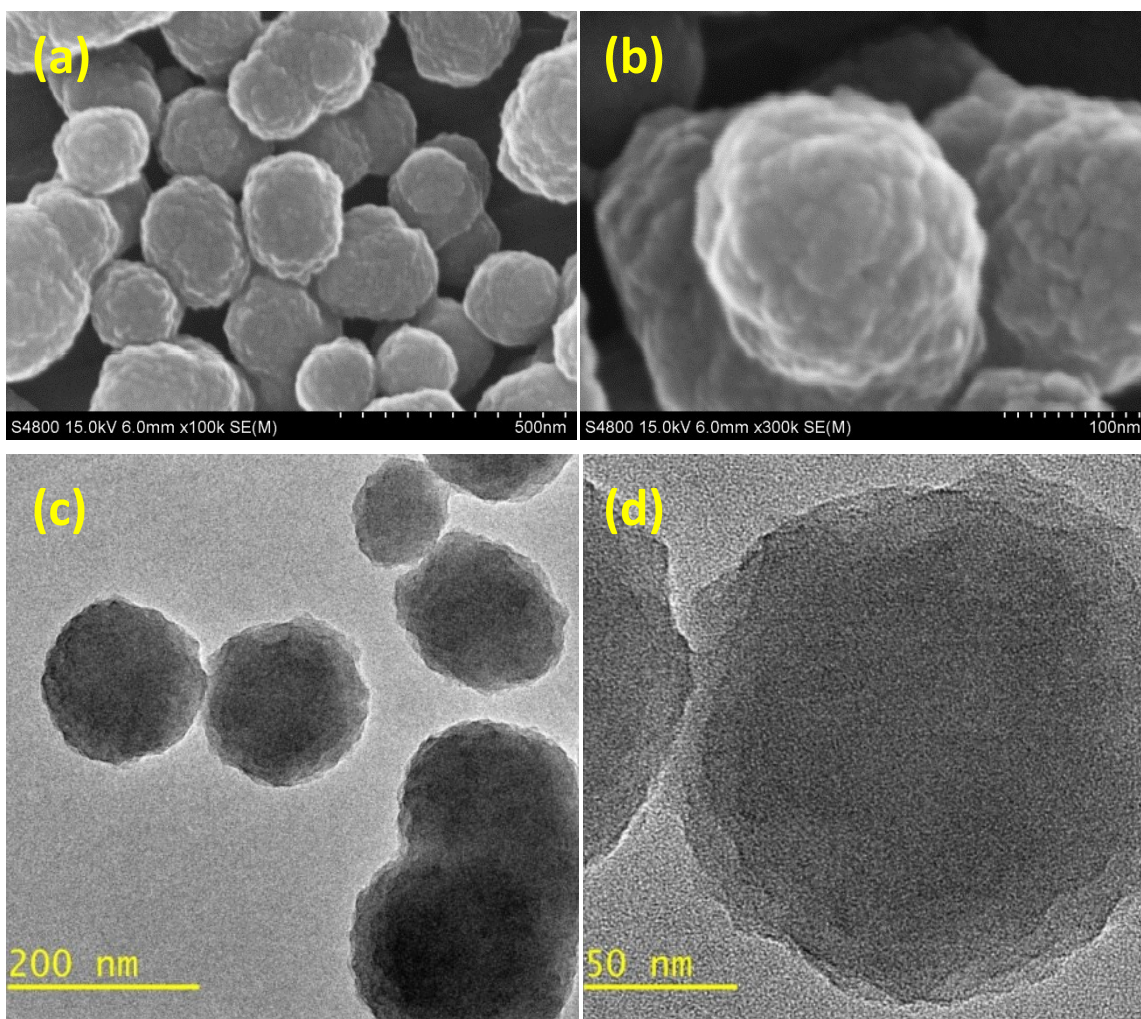

**Figure S3.** (a, b) SEM images of PR polymers , (c,d) TEM images of the corresponding carbon nanoparticles (CNs).

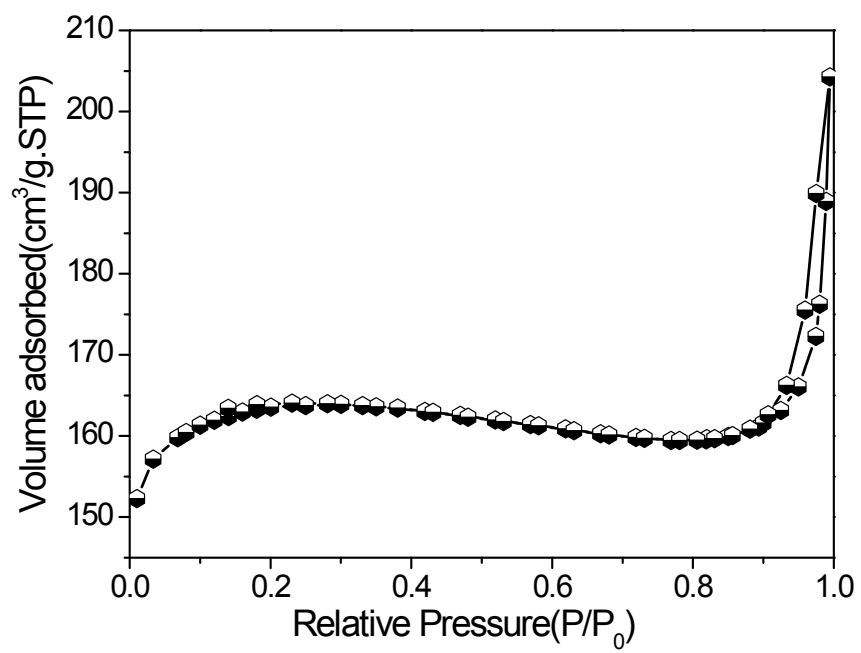

**Figure S4.** nitrogen adsorption-desorption isotherm of CSs

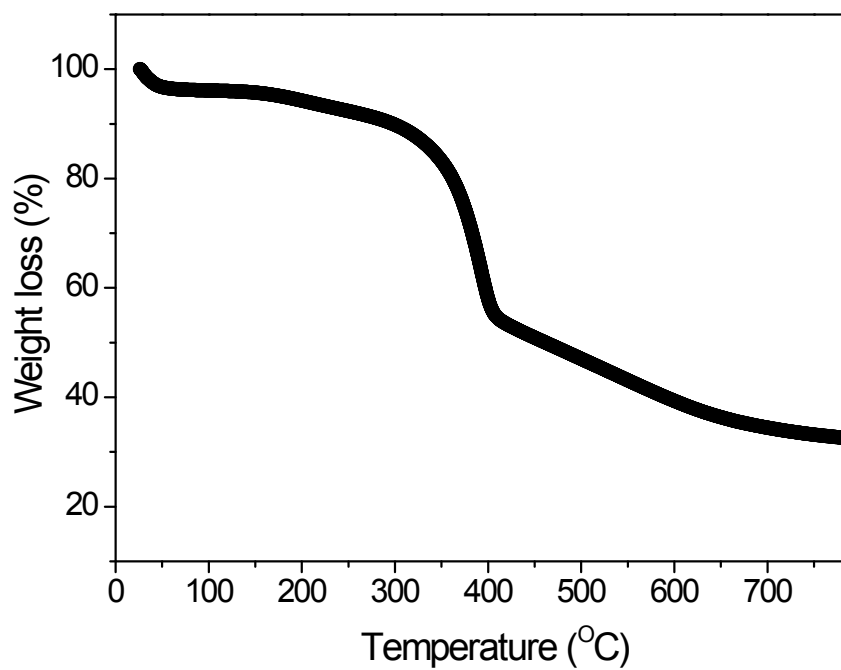

**Figure S5.** TGA curve of PR/PEO-*b*-PS composite nanoparticles. The pyrolysis process was conducted in N<sub>2</sub> with a heating rate 5 °C/min.

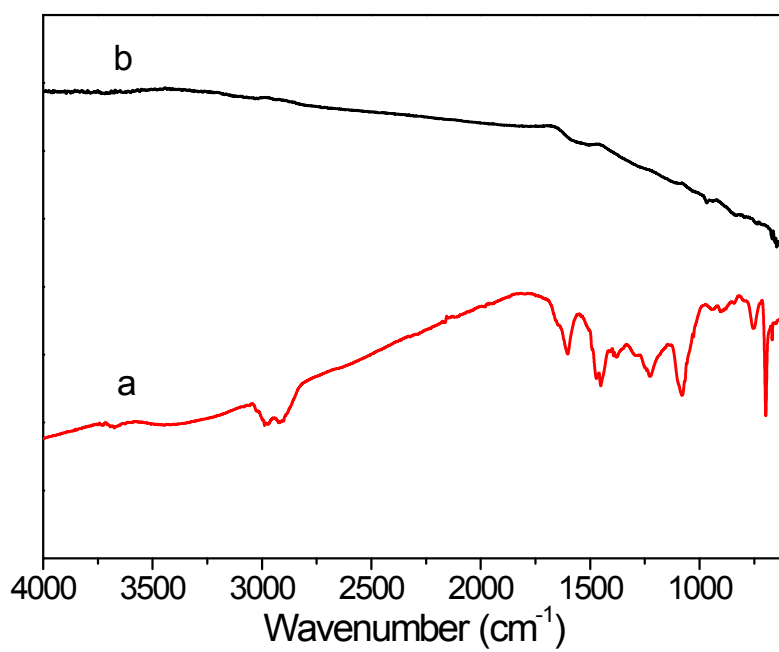

**Figure S6.** FT-IR spectra of as-made (a) PR/PEO-*b*-PS composite nanoparticles, (b) corresponding MCNs-1.

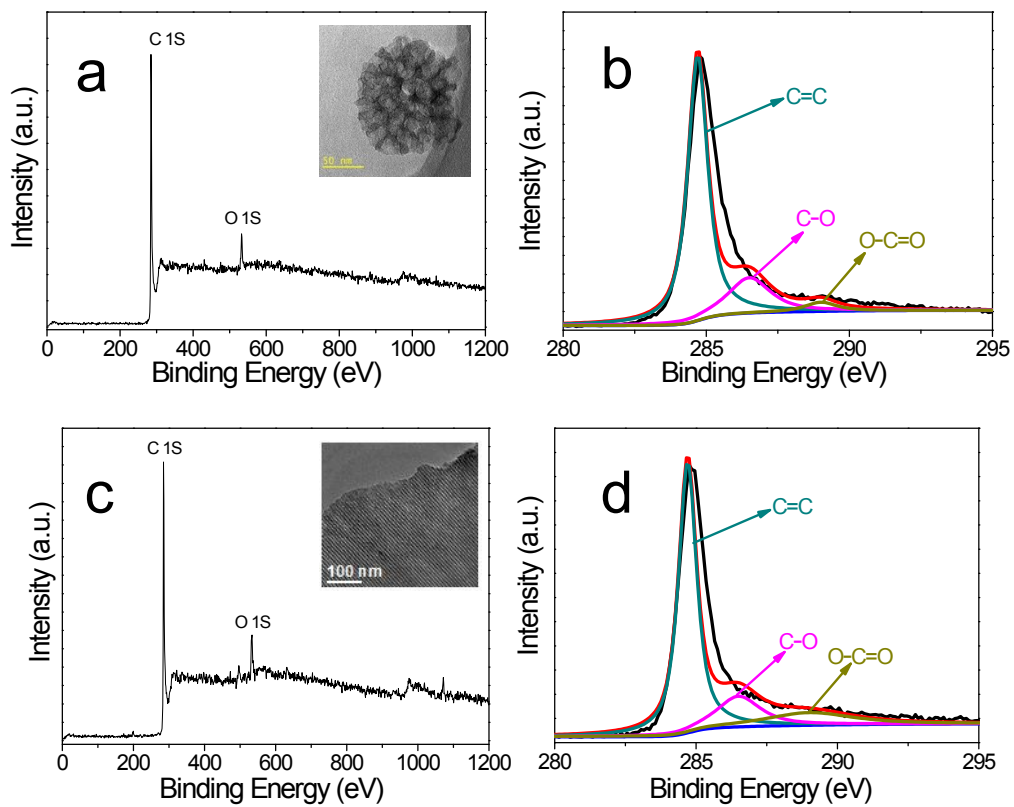

Figure S7. XPS survey spectrum of (a) MCNs, (c) OMC; High-resolution XPS spectra of C1s of (b) MCNs, (d) OMC.



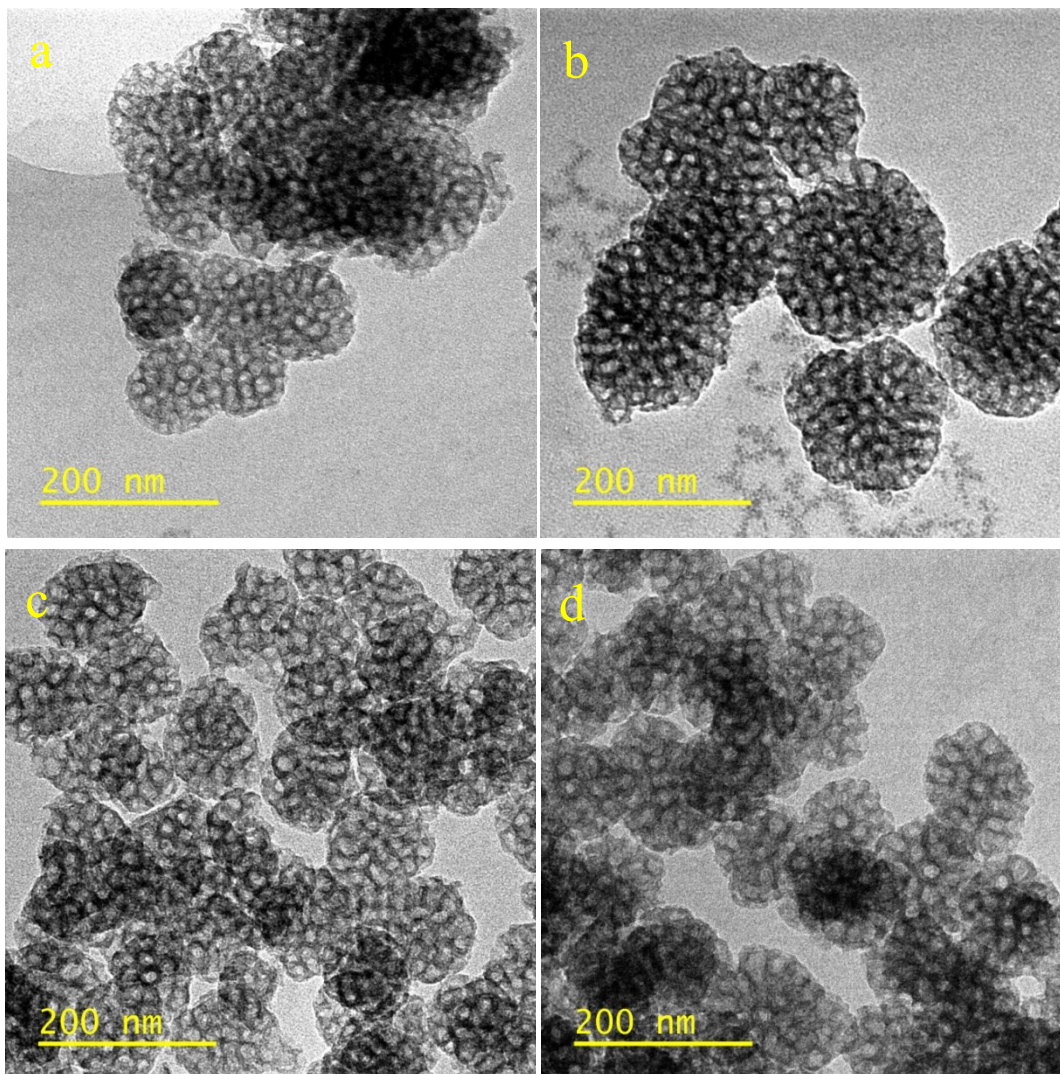

Figure S8. TEM images of MCNs obtained from synthesis condition of (a) 20 °C, (b) 40 °C, (c) 5 mL ethanol, (d) 15 mL ethanol.

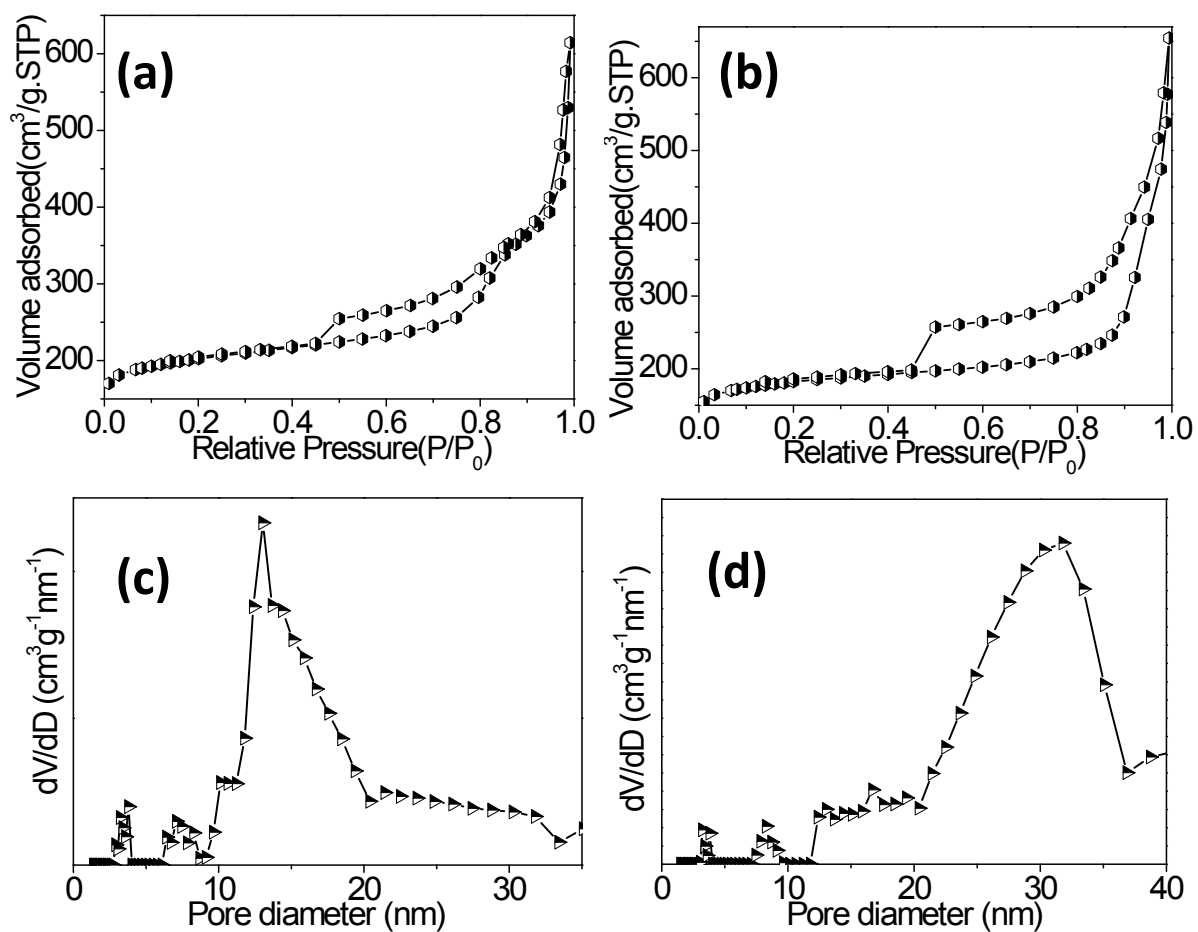

**Figure S9.** Nitrogen adsorption-desorption isotherm and NLDFT pore diameter distribution curve from adsorption branch of (a, c) MCN-0, (b, d) MCN-2.

**Table 1.** Textural parameters of the samples

| Sample | BET surface area (m <sup>2</sup> g <sup>-1</sup> ) | Pore volume (cm <sup>3</sup> g <sup>-1</sup> ) | Pore size (nm) |
|--------|----------------------------------------------------|------------------------------------------------|----------------|
| MCNs-0 | 686                                                | 0.66                                           | 13             |
| MCNs-2 | 656                                                | 0.69                                           | 32             |

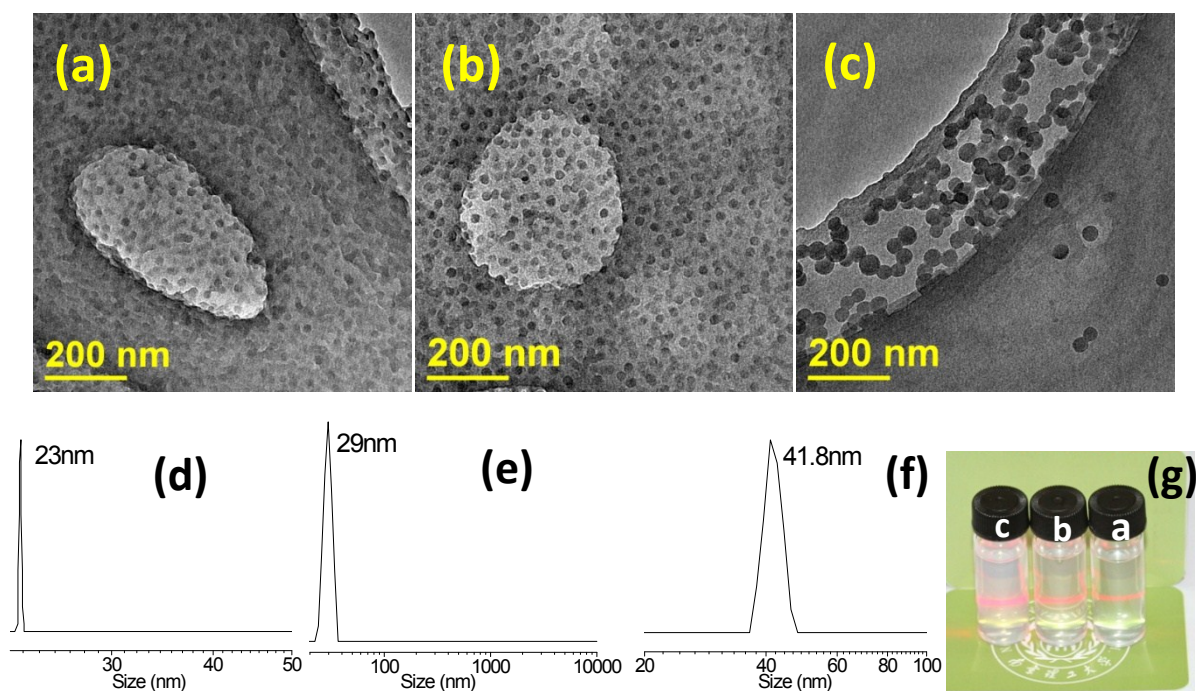

**Figure S10.** TEM images and DLS profiles of (a, d) PEO<sub>125</sub>-*b*-PS<sub>120</sub> micelle, (b, e) PEO<sub>125</sub>-*b*-PS<sub>178</sub> micelle, (d, f) PEO<sub>125</sub>-*b*-PS<sub>250</sub> micelle; (g) Photograph of PEO-*b*-PS micelles, (a) PEO<sub>125</sub>-*b*-PS<sub>120</sub>, (b) PEO<sub>125</sub>-*b*-PS<sub>178</sub>, (c) PEO<sub>125</sub>-*b*-PS<sub>250</sub>.

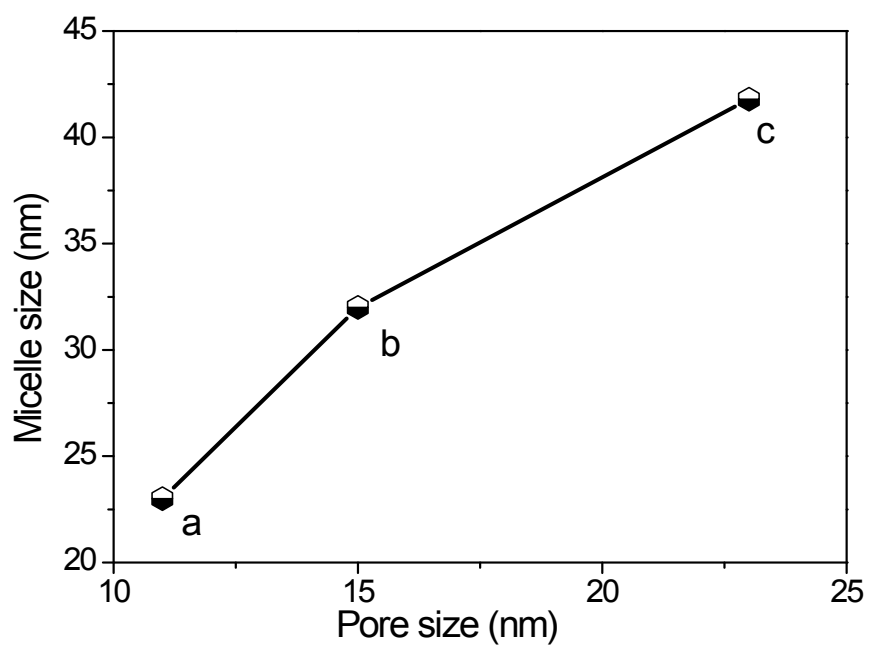

**Figure S11.** Pore size- micelle size curve of the three kinds of MCNs and corresponding micelles, (a) MCNs-0, (b) MCNs-1, MCNs-2.

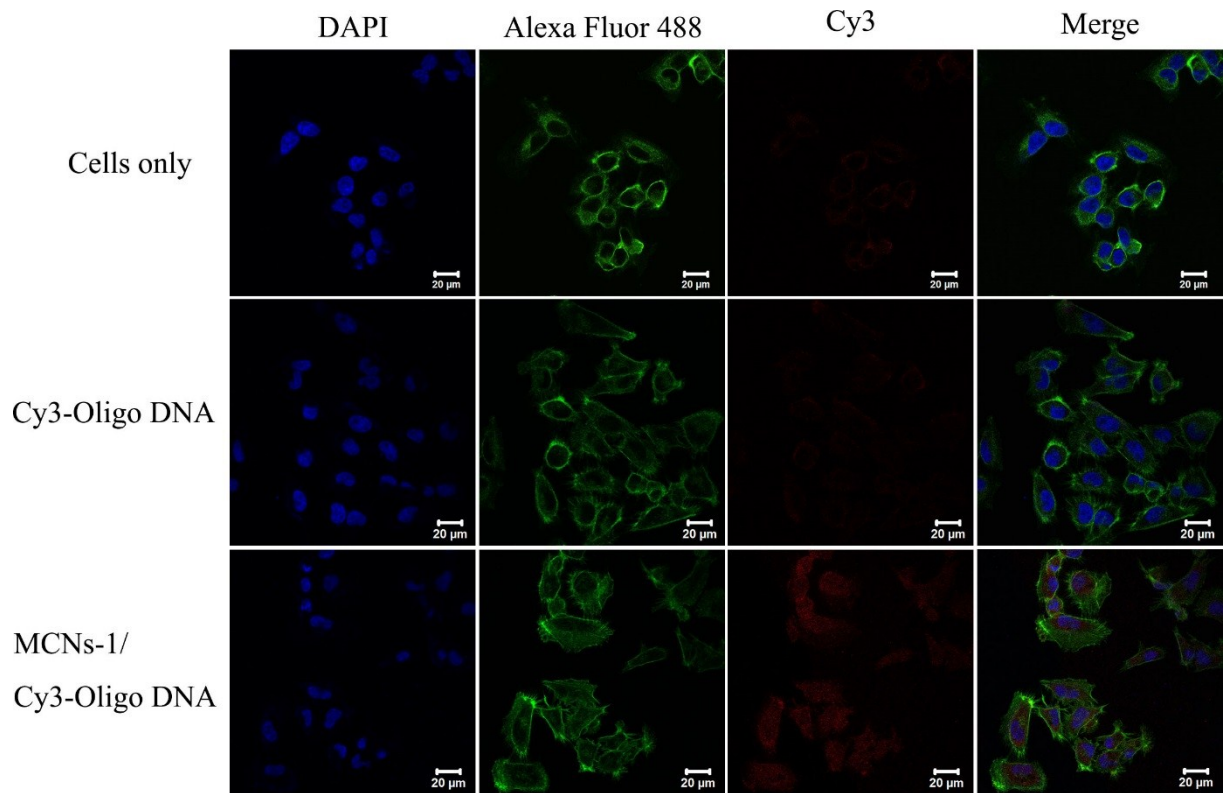

**Figure S12.** Confocal microscopy images of KHOS cells only without any treatment (first row), with the treatment of free Cy3-Oligo DNA (100nM) (second row), the complex of MSNs-1 (80 ug/ml) and Cy3-Oligo DNA (100nM) (third row). The cytoskeleton and nuclei in cells were stained by Alexa Fluor® 488 phalloidin (green) and DAPI (blue), respectively.

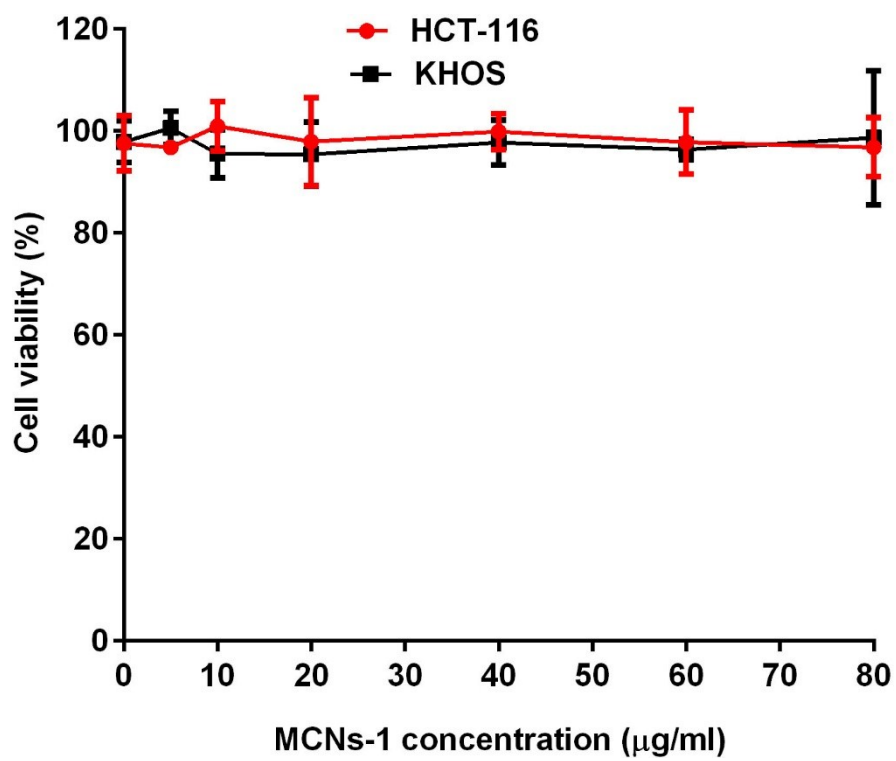

**Figure S13.** Cell viability of KHOS and HCT-116 cells after treated with MCNs-1 at different concentrations.
